# Supplementary material for: Role of a key microphysical factor in mixed-phase stratocumulus clouds and their interactions with aerosols
Source: Copernicus journal article supplement (doi:10.5194/acp-25-705-2025), 2025-01-20
Supplement: Supplementary file 1 [file acp-25-705-2025-supplement.pdf]

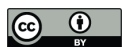

*Supplement of*

## **Role of a key microphysical factor in mixed-phase stratocumulus clouds and their interactions with aerosols**

**Seoung Soo Lee et al.**

*Correspondence to:* Seoung Soo Lee (cumulss@gmail.com, slee1247@umd.edu) and Sang-Keun Song (songsk@jejunu.ac.kr)

The copyright of individual parts of the supplement might differ from the article licence.

The altitudes (m) of grid points in the vertical direction for simulations. The altitudes are displayed from the altitude of the first grid point just above the surface to that of the last point at the model top.

4.30  
31.04  
69.36  
119.39  
181.31  
259.25  
357.50  
472.68  
544.22  
616.28  
688.84  
761.93  
906.55  
1051.10  
1195.79  
1340.41  
1485.02  
1629.64  
1774.25  
1918.86  
2063.47  
2208.08  
2352.68  
2497.29  
2641.89  
2786.49  
2931.09

3075.68

3220.28

3364.87

3509.46

3654.05

3798.63

3943.22

4087.80

4232.38

4376.95

4521.53

4666.10

4810.67
